# Supplementary material
Source: publisher figshare collection journal article supplement (https://sage.figshare.com/ndownloader/files/26711385)
Supplement: Supplementary file 1 [file 26711385]

Supplementary Figure 1 – XXXX hospital ground floor – Main Building and Outpatient Building – Identified Hotspot Areas


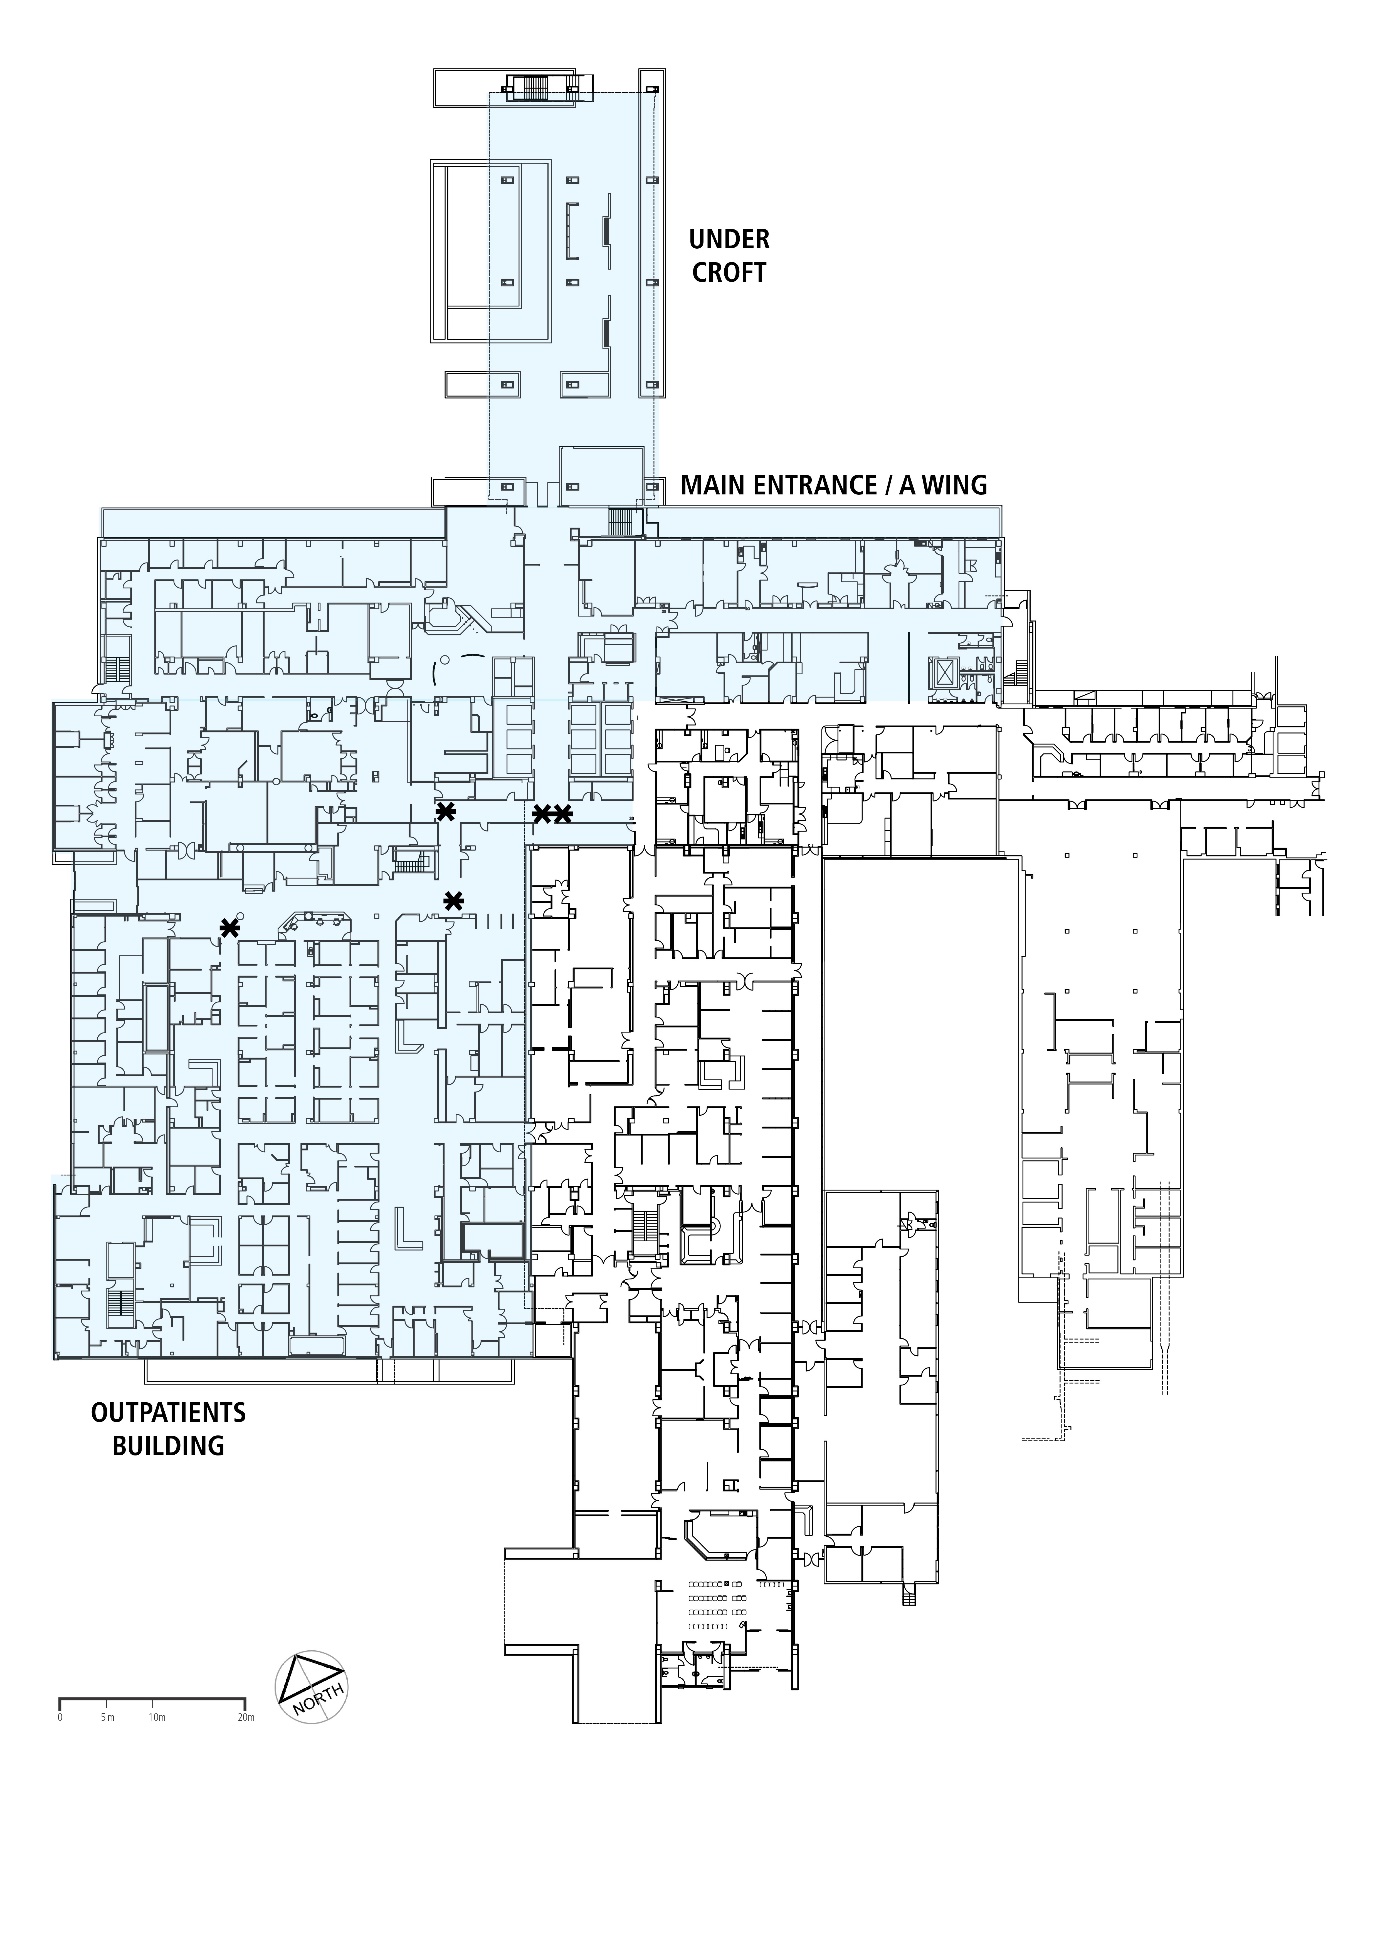


* Hotspot areas identified in the Main Building and Outpatient Building ground floors: end of corridor and in front of a round columns

** Hot spot area identified at Main Building upper floor at the end of corridor coming out of the elevators
